# Supplementary material for: Enhanced capacitive deionization performance by an rGO–SnO2 nanocomposite modified carbon felt electrode
Source: Royal Society of Chemistry journal article supplement (doi:10.1039/c7ra12764b), 2018-01-01
Supplement: c7ra12764b1.pdf [file c7ra12764b1.pdf]

## Supporting Information

### **Enhanced capacitive deionization performance by rGO-SnO<sub>2</sub> nanocomposite modified carbon felt electrode**

Syed Kamran Sami<sup>a,b</sup>, Jung-young Seo<sup>a</sup>, Suh-Eun Hyeon<sup>a</sup>, Mohammad Selim Arif Sher Shah<sup>a</sup>,  
Pil-Jin Yoo<sup>a</sup> and Chan-Hwa Chung<sup>a\*</sup>

<sup>a</sup>School of Chemical Engineering, Sungkyunkwan University (SKKU), Suwon. 16419, Republic of Korea.

<sup>b</sup>Department of Chemical Engineering, Balochistan University of Information Technology, Engineering, and Management Sciences (BUIITEMS), Quetta. 87300, Pakistan.

\*Corresponding Author:

1. **Professor Chan-Hwa Chung**

[email: chchung@skku.edu](mailto:chchung@skku.edu)

[Tel: +82-31-290-7260](tel:+82-31-290-7260)

Fig. S1

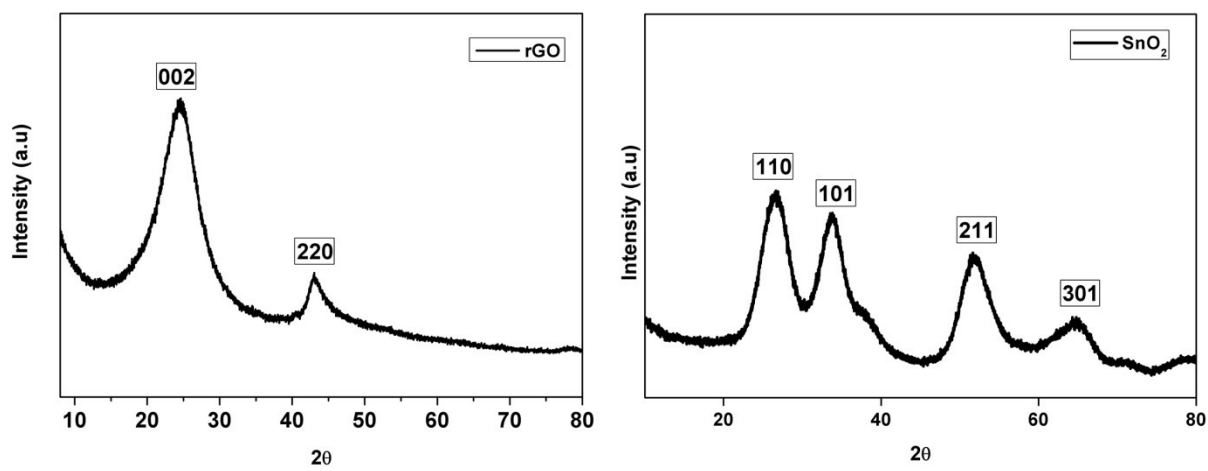

Figure S1. The XRD patterns of rGO and pristine SnO<sub>2</sub>.

**Fig. S2**

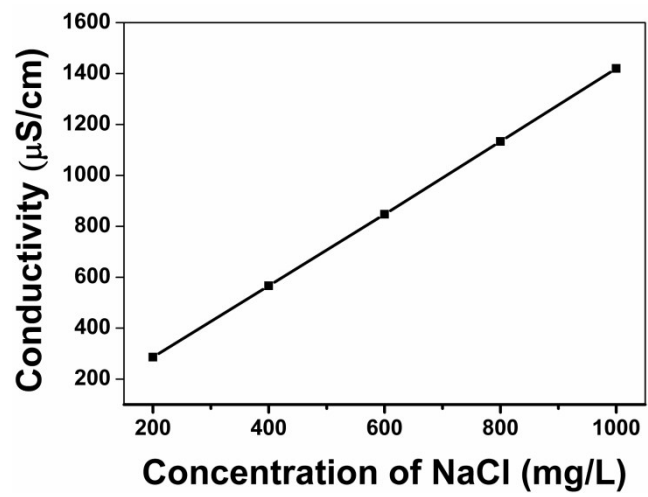

**Fig. S2.** Calibration curve for conductivity at different NaCl concentrations.

**Fig. S3**

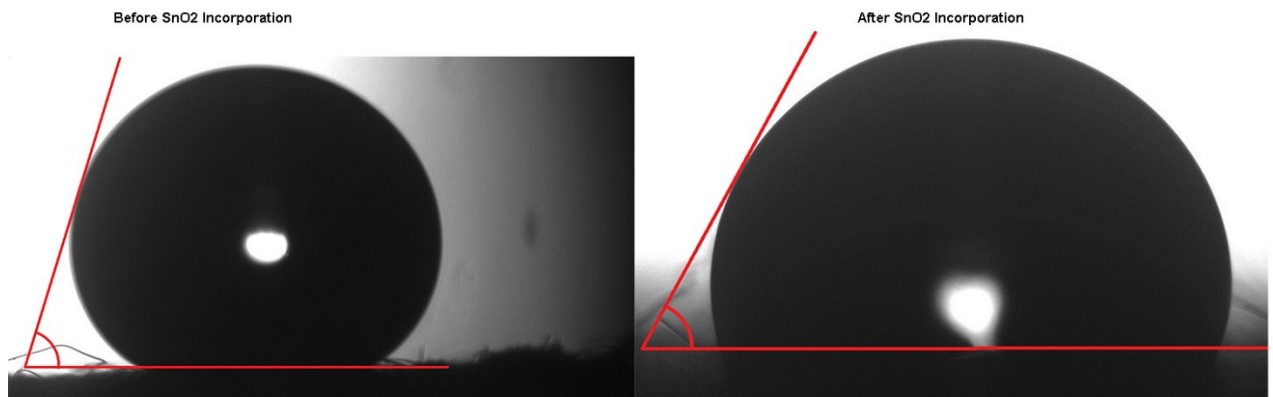

**Fig. S2.** Dynamic water contact angle analysis before and after SnO<sub>2</sub> Incorporation.

Fig. S4

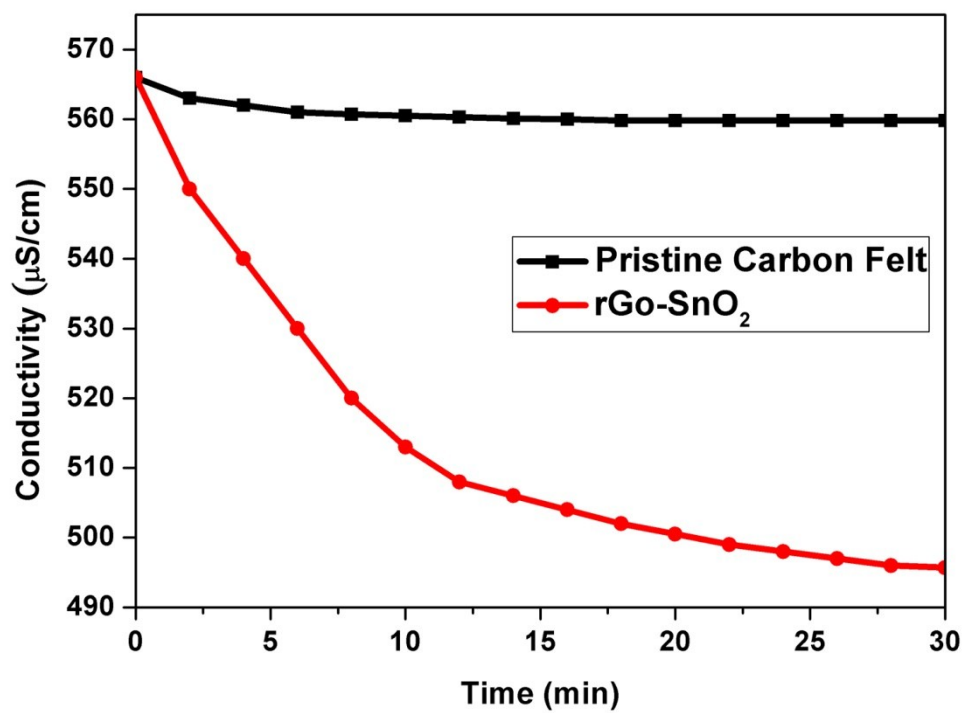

Fig. S4. Electro-sorption behavior of pristine carbon felt electrode and rGO-SnO<sub>2</sub> nano-composite electrode in CDI at 1.2V.

Fig. S5

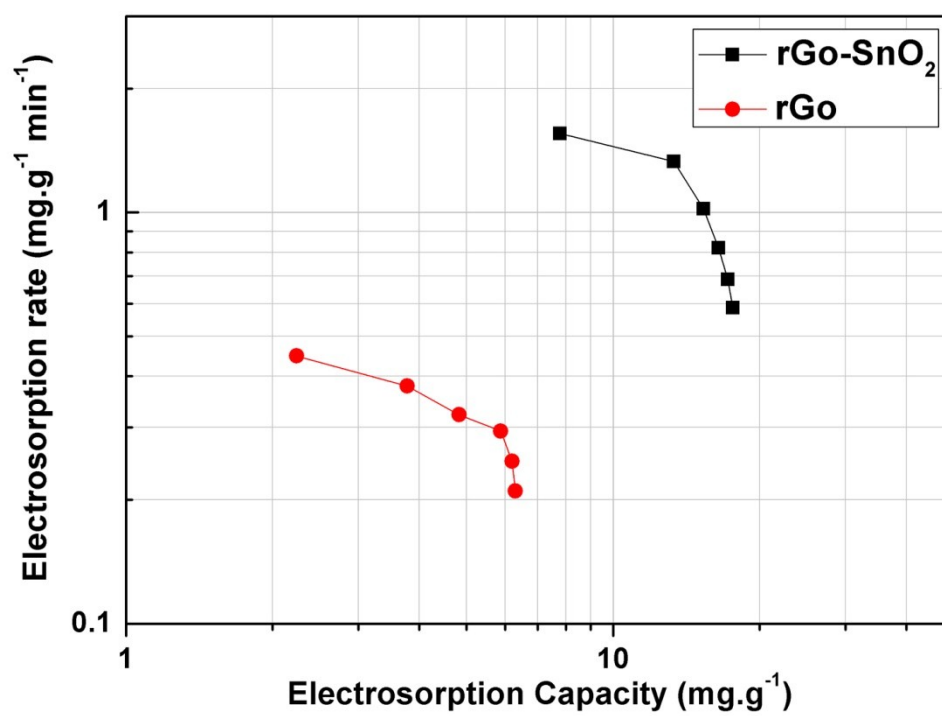

Fig. S5. CDI Ragone plot for rGO and rGO-SnO<sub>2</sub> in a 400mg/L NaCl solution at 1.2 V

**Table S1.** Salt electrosorption performance reported for different materials as electrodes for CDI.

| <b>Sr.No</b> | <b>Electrode Material</b>                  | <b>Applied Voltage (V)</b> | <b>Initial NaCl Concentration (mg/l)</b> | <b>Electrosorption Capacity (mg/g)</b> | <b>References</b> |
|--------------|--------------------------------------------|----------------------------|------------------------------------------|----------------------------------------|-------------------|
| 1            | Activated Carbon                           | 1.6                        | 1000                                     | 5.9                                    | [1]               |
| 2            | Activated Carbon fibers                    | 1.6                        | 192                                      | 4.64                                   | [2]               |
| 3            | Amine Modified Microporous Carbon          | 1.1                        | 250                                      | 5.3                                    | [3]               |
| 4            | rGO/activated carbon                       | 2                          | 50                                       | 0.8                                    | [4]               |
| 5            | Activated Carbon/Graphene                  | 1.2                        | 2230                                     | 2.4                                    | [5]               |
| 6            | Spongy Graphene Aerogel                    | 1.5                        | 32                                       | 4.95                                   | [6]               |
| 7            | Graphene Aerogel                           | 1.2                        | 250                                      | 9.9                                    | [7]               |
| 8            | Sulfonic and amine functionalized graphene | 1.4                        | 500                                      | 13.72                                  | [8]               |
| 9            | Graphene-like nanoflakes                   | 2                          | 25                                       | 1.3                                    | [9]               |
| 10           | Activated 3D graphene                      | 2                          | 70                                       | 11.86                                  | [10]              |
| 11           | Cellulose Derived Graphenic Fibers         | 1.2                        | 500                                      | 13.1                                   | [11]              |
| 12           | 3-D macroporous graphene                   | 2                          | 52                                       | 5.93                                   | [12]              |
| 13           | CNT/rGO                                    | 1.6                        | 100                                      | 0.9                                    | [13]              |
| 14           | Activated Carbon/TiO <sub>2</sub>          | 1.2                        | 100                                      | 8.04                                   | [14]              |
| 15           | Graphene-coated carbon spheres             | 1.6                        | 29                                       | 1.3                                    | [15]              |
| 16           | Graphene/MnO <sub>2</sub>                  | 1.2                        | 50                                       | 5.01                                   | [16]              |
| 17           | rGO/TiO <sub>2</sub>                       | 1.2                        | 300                                      | 16.4                                   | [17]              |

## References:

1. K. Laxman, M. T. Z. Myint, R. Khan, T. Pervez and J. Dutta, *Desalination*, 2015, **359**, 64–70.
2. G. Wang, C. Pan, L. Wang, Q. Dong, C. Yu, Z. Zhao and J. Qiu, *Electrochim. Acta*, 2012, **69**, 65–70.
3. X. Gao, A. Omosibi, J. Landon and K. Liu, *Environ. Sci. Technol.*, 2015, **49**, 10920–10926.
4. H. Li, L. Pan, C. Nie, Y. Liu and Z. Sun, *J. Mater. Chem.*, 2012, **22**, 15556.
5. H. Li, L. Pan, T. Lu, Y. Zhan, C. Nie and Z. Sun, *J. Electroanal. Chem.*, 2011, **653**, 40–44.
6. Z. Y. Yang, L. J. Jin, G. Q. Lu, Q. Q. Xiao, Y. X. Zhang, L. Jing, X. X. Zhang, Y. M. Yan and K. N. Sun, *Adv. Funct. Mater.*, 2014, **24**, 3917–3925.
7. H. Yin, S. Zhao, J. Wan, H. Tang, L. Chang, L. He, H. Zhao, Y. Gao and Z. Tang, *Adv. Mater.*, 2013, **25**, 6270–6276.
8. P. Liu, H. Wang, T. Yan, J. Zhang, L. Shi and D. Zhang, *J. Mater. Chem. A*, 2016, **4**, 5303–5313.
9. H. Li, L. Zou, L. Pan and Z. Sun, *Environ. Sci. Technol.*, 2010, **44**, 8692–8697.
10. Z. Li, B. Song, Z. Wu, Z. Lin, Y. Yao, K. S. Moon and C. P. Wong, *Nano Energy*, 2015, **11**, 711–718.
11. N. Pugazhenthiran, S. Sen Gupta, A. Prabath, M. Manikandan, J. R. Swathy, V. K. Raman and T. Pradeep, *ACS Appl. Mater. Interfaces*, 2015, **7**, 20156–20163.
12. H. Wang, D. Zhang, T. Yan, X. Wen, J. Zhang, L. Shi and Q. Zhong, *J. Mater. Chem. A*, 2013, **1**, 11778–11789.
13. H. Li, S. Liang, J. Li and L. He, *J. Mater. Chem. A*, 2013, **1**, 6335–6341.
14. P. I. Liu, L. C. Chung, H. Shao, T. M. Liang, R. Y. Horng, C. C. M. Ma and M. C. Chang, *Electrochim. Acta*, 2013, **96**, 173–179.
15. H. Wang, L. Shi, T. Yan, J. Zhang, Q. Zhong and D. Zhang, *J. Mater. Chem. A*, 2014, **2**, 4739–4750.
16. A. G. El-Deen, N. A. M. Barakat and H. Y. Kim, *Desalination*, 2014, **344**, 289–298.
17. A. G. El-Deen, J.-H. Choi, C. S. Kim, K. A. Khalil, A. A. Almajid and N. A. M. Barakat, *Desalination*, 2015, **361**, 53–64.
